# Supplementary material for: Benzoic Acid and Its Hydroxylated Derivatives Suppress Early Blight of Tomato (Alternaria solani) via the Induction of Salicylic Acid Biosynthesis and Enzymatic and Nonenzymatic Antioxidant Defense Machinery
Source: MDPI journal article supplement (doi:10.3390/jof7080663), 2021-08-16
Supplement: s1 [file s1]

## Supplementary Materials:

**Table S1.** Primers used for gene expression analysis of antioxidant enzymes, salicylic acid biosynthesis genes, and pathogenesis-related proteins of tomato (*Solanum lycopersicum*) using real-time RT-PCR <sup>a</sup>.

| Description                       | Gene     | NCBI<br>Accession number |   | Primer<br>(Forward and Reverse) | TM<br>(°C) | Product<br>size<br>(bp) |
|-----------------------------------|----------|--------------------------|---|---------------------------------|------------|-------------------------|
| Antioxidant enzymes               |          |                          |   |                                 |            |                         |
| Cytosolic ascorbate peroxidase 1  | SIAPX1   | NM_001247853.2           | F | GGCTCTCCTTTGTGATCCT<br>G        | 59.80      | 211                     |
|                                   |          |                          | R | CAAAAACAACAGCTCCA<br>GCA        | 60.03      |                         |
| Cytosolic ascorbate peroxidase 2  | SIAPX2   | NM_001247859.2           | F | TACGGGAGGACCTGATG<br>TTC        | 59.93      | 216                     |
|                                   |          |                          | R | CAAGGTCCCTCAAAACC<br>AGA        | 60.08      |                         |
| Superoxide dismutase [Cu-Zn] 1    | SICuSOD1 | NM_001247102.2           | F | TGAATTGGGGTTGAACCA<br>TT        | 60.03      | 189                     |
|                                   |          |                          | R | GCAGGCACTGTAATCTGC<br>AA        | 60.02      |                         |
| Iron superoxide dismutase         | SIFeSOD  | NM_001313769.1           | F | GCCACTGCCTCTGCTAAT<br>TC        | 59.98      | 193                     |
|                                   |          |                          | R | TATGAGGCTCCAAAGCAT<br>CC        | 60.18      |                         |
| Salicylic acid biosynthesis genes |          |                          |   |                                 |            |                         |
| Isochorismate synthase            | SIICS    | NM_001247865.2           | F | CATTGTCGATGAATGGAT<br>GC        | 59.89      | 243                     |
|                                   |          |                          | R | CTTTGGAGAGTCCGAGCA<br>AC        | 59.99      |                         |
| Aldehyde oxidase                  | SIAO2    | NM_001247524.1           | F | CGGTTTCCATGCTTCTCA<br>AT        | 60.07      | 209                     |
|                                   |          |                          | R | CAAAAGTCTTGCAGGCAT<br>CA        | 59.99      |                         |
| Phenylalanine ammonia-lyase 1     | SIPAL1   | XM_004234584.3           | F | ACGGGTTGCCATCTAATC<br>TG        | 59.96      | 197                     |
|                                   |          |                          | R | AGCTGTTTTCTGGCTGA<br>AA         | 59.99      |                         |
| Phenylalanine ammonia-lyase 2     | SIPAL2   | NM_001320601.1           | F | AGGCTACTCCGGCATAA<br>GGT        | 60.12      | 223                     |
|                                   |          |                          | R | AATACCAGCCTGTTGGAA<br>CG        | 59.99      |                         |
| Phenylalanine ammonia-lyase 3     | SIPAL3   | NM_001320609.1           | F | GAAAACCGCTGAGGCTG<br>TAG        | 60.02      | 219                     |
|                                   |          |                          | R | CTGTCCACAACCTCGAAGC<br>AA       | 60.02      |                         |
| Phenylalanine ammonia-lyase 5     | SIPAL5   | NM_001320040.1           | F | GCCAAGCTATCGACTTGA<br>GG        | 59.98      | 190                     |
|                                   |          |                          | R | CAGGGGTCATCAGCATA<br>GGT        | 59.95      |                         |
| Phenylalanine ammonia-lyase 6     | SIPAL6   | XM_004249510.4           | F | TTCAGGGGTACTCTGGCA<br>TC        | 60.07      | 204                     |
|                                   |          |                          | R | CCTCAGCATTC AACGTCT<br>CA       | 59.98      |                         |
| Pathogenesis-related proteins     |          |                          |   |                                 |            |                         |

| Description                                    | Gene     | NCBI<br>Accession number |   | Primer<br>(Forward and Reverse) | TM<br>(°C) | Product<br>size<br>(bp) |
|------------------------------------------------|----------|--------------------------|---|---------------------------------|------------|-------------------------|
| Pathogenesis-related protein 1                 | SIPR-1   | XM_004242627.4           | F | GGTGGGCAAATTCAAGA<br>AGA        | 60.05      | 194                     |
|                                                |          |                          | R | CCCACATAATTGCCCTTC<br>AA        | 60.69      |                         |
| Pathogenesis-related protein 1a2               | SIPR1a2  | NM_001321040.2           | F | GCTCAAAATTCACCCCAA<br>GA        | 60.05      | 162                     |
|                                                |          |                          | R | CTCCCCTGAACCAGAATG<br>AA        | 60.04      |                         |
| Pathogenesis-related protein B1-2              | SIPRB1-2 | XM_019216060.1           | F | CGGTGAACACTGGAAAT<br>GTG        | 60.00      | 189                     |
|                                                |          |                          | R | GGAGCATCGCCATTAATC<br>AT        | 59.89      |                         |
| Pathogenesis-related leaf protein 4            | SIPR4    | XM_004246675.4           | F | GTAACAACGGGTGGTGG<br>TTC        | 60.13      | 246                     |
|                                                |          |                          | R | ATGCCCACCCTTCCTAT<br>AC         | 60.04      |                         |
| Pathogenesis-related protein 5                 | SIPR5    | NM_001330783.1           | F | GAGTCCTGGATTGCAAA<br>GGA        | 60.20      | 209                     |
|                                                |          |                          | R | AAGTGAACCAGGGCATT<br>CAC        | 59.97      |                         |
| Pathogenesis-related leaf protein 6            | SIPR6    | NM_001247385.2           | F | TCCGAGAGGCCAAGCTA<br>TAA        | 59.94      | 189                     |
|                                                |          |                          | R | GTAAGGACGTTGTCCGAT<br>CC        | 59.41      |                         |
| Nonexpressor of Pathogenesis-related protein 1 | SINPR1   | NM_001247629.2           | F | GCTTTTTCGGATTCCAAT<br>GA        | 60.02      | 157                     |
|                                                |          |                          | R | CAGCGAAGAAGTCGAAA<br>TCC        | 59.96      |                         |
| Salicylic Acid Binding Protein                 | SISABP2  | XM_004233374.4           | F | AACGGACACCAGCAGAG<br>AAT        | 59.73      | 198                     |
|                                                |          |                          | R | TGGCCTTTGACAAATCTT<br>CC        | 60.05      |                         |
| Reference genes                                |          |                          |   |                                 |            |                         |
| Actin                                          | SIACT    | NM_001330119.1           | F | ATGGTGGGTATGGGTCAA<br>AA        | 60.07      | 197                     |
|                                                |          |                          | R | GGGGCTTCAGTTAGGAG<br>GAC        | 59.91      |                         |
| F-box/kelch-repeat protein                     | SIF-box  | XM_004234570.4           | F | CGGTTGACCCGATAAGA<br>AAA        | 59.93      | 200                     |
|                                                |          |                          | R | GGTCGCGTATCAGGGTAG<br>AA        | 60.10      |                         |

<sup>a</sup> The listed genes were assembled based on recent available data in national center for biotechnology information website (NCBI, <http://www.ncbi.nlm.nih.gov/gene/>).
